# Supplementary material for: Increased photosynthesis and grain yields in maize grown with less irrigation water combined with density adjustment in semiarid regions
Source: PeerJ. 2020 Oct 6;8:e9959. doi: 10.7717/peerj.9959 (PMC7546219; doi:10.7717/peerj.9959)
Supplement: Data S1 [file peerj-08-9959-s001.xlsx]

## Sheet: sheet1
years	PD	Irrigation	treatments	treatments	gain yield	TDMA	ET	WUEB	WUEG	V11-Pn	After irrigation at 11-leaf stage-Pn	SK-Pn	After irrigation at silking stage-Pn	FL-Pn	avg-Pn	V11-Tr	After irrigation at 11-leaf stage-Tr	SK-Tr	After irrigation at silking stage-Tr	FL-Tr	avg-Tr	V11-WUEL	After irrigation at 11-leaf stage-WUEL	SK-WUEL	After irrigation at silking stage-WUEL	FL-WUEL	avg-WUEL	V11-Fv/Fo	After irrigation at 11-leaf stage-Fv/Fo	SK-Fv/Fo	After irrigation at silking stageFv/Fo	FL-Fv/Fo	V11-Fv/Fm	After irrigation at 11-leaf stage-Fv/Fm	SK-Fv/Fm	After irrigation at silking stageFv/Fm	FL-Fv/Fm
1	1	1	1	LNI	11349.1	20.91	473.84	45.68	24.52	24.35	26.6	27.58	28.46	21.45	25.38	5.34	5.7	5.04	5.1	4.36	5.05	4.92	5.13	6.03	6.04	5.23	5.43	1.01	0.94	2.48	2.17	3.57	0.48	0.46	0.63	0.58	0.78
1	1	2	2	LIV	12586.9	22.7	508.42	46.31	25.93	25.17	30.25	29.46	30.64	24.3	27.74	5.67	7.28	5.33	5.39	4.61	5.56	4.81	4.54	5.98	6.17	5.63	5.37	0.99	1.3	2.97	2.75	4.09	0.48	0.51	0.67	0.63	0.85
1	1	3	3	LIS	12735.5	23.27	500.43	49.1	26.7	24.95	26.62	27.95	33.86	25.72	27.78	5.51	5.86	4.97	6.65	4.57	5.49	4.83	4.9	5.99	5.6	5.95	5.48	1.02	1.02	2.55	3.38	4.22	0.46	0.48	0.64	0.68	0.85
1	1	4	4	LIVS	12980.8	23.55	536.07	47.38	25.8	24.53	30.9	29.77	34.81	25.93	29.39	5.6	7.27	5.22	6.67	4.7	5.89	4.82	4.54	6.14	5.63	5.93	5.43	1.02	1.35	3.06	3.86	4.37	0.47	0.51	0.66	0.68	0.87
1	2	1	5	MNI	12184	24.75	490.09	52.42	26.25	24.48	25.21	26.64	26.97	19.57	24.28	5.05	5.48	4.9	4.9	4.33	4.89	5.22	4.9	5.88	5.91	4.91	5.35	0.97	0.9	2.35	2.13	3.51	0.47	0.44	0.61	0.57	0.78
1	2	2	6	MIV	13395.6	26.1	517.15	53.61	26.99	24.37	29.75	28.24	29.22	21.75	26.39	5.1	7.13	5.04	5.21	4.31	5.39	5.12	4.43	5.89	5.98	5.29	5.36	0.97	1.28	2.82	2.53	3.87	0.47	0.49	0.67	0.62	0.84
1	2	3	7	MIS	14397.7	26.85	506.78	56.06	29.68	24.63	25.31	26.47	32.7	24.22	26.62	5.11	5.55	4.9	6.44	4.42	5.31	5.26	4.94	5.92	5.54	5.98	5.54	1.01	0.97	2.42	3.14	3.97	0.46	0.47	0.64	0.65	0.85
1	2	4	8	MIVS	14377.5	27.96	541.33	55.35	28.4	24.19	29.78	28.32	32.92	24.6	28.15	5.2	7.06	5.12	6.53	4.48	5.71	5.05	4.64	5.98	5.49	5.99	5.44	1	1.32	2.94	3.63	4.23	0.47	0.5	0.65	0.68	0.86
1	3	1	9	HNI	12369.8	27.16	497.6	57.53	26.12	23.26	23.76	23.14	22.6	15.32	21.66	4.63	5.35	4.54	4.58	3.68	4.58	5.4	4.7	5.4	5.37	4.47	5.05	0.9	0.85	2.2	2.04	3.13	0.43	0.43	0.61	0.55	0.74
1	3	2	10	HIV	13537.4	28.97	523.7	58.25	26.95	23.48	27.74	24.89	25.55	17.87	23.76	4.68	6.69	4.61	4.75	3.9	4.94	5.51	4.46	5.75	5.84	4.93	5.32	0.97	1.23	2.65	2.39	3.6	0.46	0.5	0.65	0.59	0.82
1	3	3	11	HIS	14093.5	29.41	519.02	61.03	29.32	23.91	23.62	22.7	27.38	19.74	23.76	4.81	5.46	4.49	5.61	3.87	4.87	5.37	4.62	5.37	5.18	5.36	5.27	0.99	0.94	2.19	2.99	3.78	0.43	0.47	0.62	0.64	0.84
1	3	4	12	HIVS	14516.2	29.88	547.87	58.5	27.96	23.33	27.99	24.79	28.06	19.76	24.95	4.79	6.74	4.65	5.88	3.99	5.25	5.26	4.38	5.71	5.17	5.29	5.22	0.93	1.27	2.74	3.43	3.95	0.43	0.49	0.65	0.66	0.84
1	1	1	1	LNI	10701.4	19.65	456.01	43.21	23.51	22.26	24.53	25.28	26.46	19.46	23.62	4.95	5.21	4.58	4.66	4.04	4.64	4.47	4.65	5.45	5.61	4.84	4.97	0.93	0.86	2.23	1.98	3.29	0.44	0.42	0.58	0.53	0.73
1	1	2	2	LIV	11693.9	21.26	484.81	44.22	24.38	22.99	27.74	27.18	27.63	22.19	25.31	5.17	6.58	4.83	4.93	4.19	5.19	4.41	4.11	5.54	5.62	5.23	4.98	0.91	1.19	2.69	2.42	3.75	0.44	0.47	0.61	0.57	0.78
1	1	3	3	LIS	12005.5	21.66	475.33	46.02	24.84	22.93	24.52	25.5	30.73	23.51	25.5	5.11	5.33	4.59	6.04	4.28	5.09	4.49	4.49	5.59	5.06	5.47	4.99	0.95	0.94	2.34	2.98	3.83	0.42	0.44	0.59	0.61	0.79
1	1	4	4	LIVS	12174	22.12	500.25	43.75	23.89	22.63	27.81	27.1	31.73	23.92	26.53	5.1	6.64	4.75	6.05	4.31	5.39	4.4	4.11	5.62	5.12	5.48	4.9	0.94	1.22	2.8	3.33	4.01	0.43	0.47	0.61	0.62	0.79
1	2	1	5	MNI	11343	23.28	464.2	49.31	24.58	22.29	23.38	24.48	24.73	17.71	22.72	4.61	5.03	4.48	4.5	3.97	4.56	4.75	4.5	5.32	5.44	4.46	4.88	0.89	0.83	2.14	1.96	3.17	0.43	0.41	0.55	0.52	0.72
1	2	2	6	MIV	12361.6	24.48	483.06	50.14	25.51	22.59	27.27	25.77	26.81	19.83	24.4	4.7	6.62	4.71	4.77	4.06	4.91	4.7	4.06	5.52	5.51	4.94	4.99	0.9	1.18	2.55	2.25	3.62	0.44	0.46	0.6	0.57	0.77
1	2	3	7	MIS	13343.7	25.08	474.45	52.51	27.57	22.81	23.39	24.3	29.94	22.2	24.7	4.74	5.18	4.52	5.87	4.06	4.87	4.79	4.55	5.35	5	5.51	5	0.93	0.91	2.22	2.76	3.67	0.42	0.43	0.58	0.6	0.78
1	2	4	8	MIVS	13527.7	25.99	503.38	51.1	26.52	22.31	27.4	26.2	29.51	22.52	25.9	4.71	6.44	4.68	5.87	4.09	5.14	4.67	4.19	5.5	4.97	5.47	4.98	0.92	1.21	2.68	3.15	3.88	0.44	0.46	0.59	0.61	0.8
1	3	1	9	HNI	11758.6	25.59	471.06	54.46	24.43	21.72	21.95	21.39	20.74	14.42	20.18	4.28	4.99	4.18	4.2	3.4	4.18	4.98	4.39	5.01	4.88	4.11	4.64	0.82	0.79	1.99	1.83	2.87	0.4	0.41	0.55	0.5	0.68
1	3	2	10	HIV	12663.4	27.07	492.12	55.48	25.2	21.9	25.33	22.88	23.17	16.32	21.72	4.29	6.23	4.24	4.33	3.59	4.55	5.06	4.05	5.29	5.39	4.49	4.84	0.89	1.11	2.39	2.15	3.32	0.42	0.47	0.59	0.54	0.75
1	3	3	11	HIS	13307.5	27.8	484.24	56.93	27.22	22.64	22.35	21.18	25.18	18.53	21.88	4.47	5.07	4.14	5.23	3.62	4.52	5.04	4.4	4.99	4.86	5.03	4.81	0.92	0.86	2.01	2.65	3.5	0.41	0.43	0.58	0.58	0.77
1	3	4	12	HIVS	13509.1	27.77	510.72	53.36	25.97	21.62	25.59	22.79	25.59	18.46	23.14	4.39	6.24	4.33	5.31	3.68	4.78	4.82	4.1	5.23	4.76	4.94	4.79	0.86	1.16	2.49	3.03	3.63	0.4	0.46	0.59	0.62	0.77
1	1	1	1	LNI	10545.8	19.08	446.51	41.1	23.02	20.89	23.42	24.29	24.76	18.45	22.65	4.63	4.84	4.31	4.41	3.81	4.5	4.19	4.42	5.14	5.22	4.52	4.77	0.88	0.8	2.06	1.87	3.11	0.4	0.39	0.53	0.49	0.67
1	1	2	2	LIV	11303.4	20.63	465.51	42.31	22.87	21.33	25.88	25.06	26.25	20.53	24.27	4.8	6.24	4.52	4.62	4	4.88	4.11	3.87	5.17	5.18	4.85	4.7	0.86	1.08	2.4	2.2	3.48	0.41	0.43	0.57	0.54	0.72
1	1	3	3	LIS	11297.1	21.36	459.82	43.4	23.77	21.83	23.17	24.61	29.46	22.27	24.25	4.79	5.09	4.34	5.52	4	4.75	4.25	4.3	5.27	4.83	5.27	4.79	0.9	0.87	2.13	2.64	3.61	0.4	0.41	0.56	0.56	0.74
1	1	4	4	LIVS	11451.2	21.31	482.3	41.18	22.62	21.29	25.61	25.79	29.01	22.18	24.68	4.74	6.25	4.55	5.73	4.11	5.06	4.08	3.89	5.32	4.79	5.06	4.66	0.9	1.13	2.61	2.89	3.73	0.42	0.44	0.57	0.59	0.76
1	2	1	5	MNI	10981.2	21.86	442.77	48.34	23.27	20.84	21.94	22.97	23.75	16.9	21.37	4.44	4.85	4.28	4.3	3.7	4.31	4.42	4.38	5.08	5.17	4.17	4.67	0.84	0.77	2.02	1.81	3	0.4	0.38	0.53	0.5	0.66
1	2	2	6	MIV	12075.4	24.01	468.64	48.59	24.77	21.19	25.18	24.6	25.12	19.09	23.37	4.4	6.14	4.44	4.6	3.82	4.71	4.57	3.91	5.21	5.21	4.7	4.66	0.86	1.12	2.34	2.09	3.44	0.42	0.43	0.55	0.53	0.73
1	2	3	7	MIS	12476.9	24.63	464.79	50.26	26.19	21.51	22.7	23.19	27.24	21.32	23.07	4.4	4.87	4.17	5.33	3.81	4.49	4.47	4.24	5.05	4.75	5.05	4.74	0.85	0.84	2.14	2.53	3.48	0.39	0.41	0.54	0.54	0.71
1	2	4	8	MIVS	12696.6	24.54	479.7	48.02	24.98	21	26.07	24.53	27.63	21.64	23.67	4.45	6.03	4.45	5.48	3.87	4.84	4.38	3.96	5.16	4.65	5.13	4.63	0.85	1.16	2.46	2.78	3.55	0.41	0.43	0.56	0.57	0.76
1	3	1	9	HNI	11182.1	24.66	450.6	51.64	24.09	20.78	21.37	19.95	19.81	13.53	18.91	4.13	4.72	4.06	3.96	3.33	4.05	4.75	4.28	4.73	4.62	3.89	4.5	0.8	0.76	1.9	1.68	2.71	0.37	0.39	0.51	0.48	0.64
1	3	2	10	HIV	11926.2	26.32	468.24	52.76	24.92	20.44	24.18	21.17	22.08	15.31	20.98	3.92	5.77	3.99	4.03	3.34	4.18	4.74	3.89	5.06	4.97	4.29	4.58	0.82	1.07	2.2	1.92	3.1	0.39	0.43	0.55	0.52	0.7
1	3	3	11	HIS	12821.1	26.39	461.51	53.25	25.84	21.62	21.45	20.15	24.39	17.43	20.81	4.24	4.8	4.03	4.94	3.46	4.26	4.71	4.17	4.81	4.59	4.87	4.6	0.86	0.84	1.89	2.36	3.4	0.39	0.4	0.55	0.56	0.74
1	3	4	12	HIVS	12780.2	26.4	491.59	50.8	25.04	20.3	24.66	21.87	24.65	17.69	21.34	4.18	6.01	4.07	5.04	3.54	4.54	4.58	3.88	5.02	4.54	4.73	4.47	0.81	1.11	2.33	2.68	3.36	0.39	0.43	0.55	0.57	0.72
2	1	1	1	LNI	9615.26	19.46	363.58	56.05	27.81	22.99	24.5	24.95	25.33	16.5	22.74	4.6	4.95	4.39	4.69	3.62	4.36	5.49	5.32	6.25	5.85	4.94	5.54	0.87	0.94	2.04	2.04	2.76	0.43	0.42	0.6	0.59	0.75
2	1	2	2	LIV	11660.8	21.78	406.88	56.51	29.69	24.69	28.85	28.97	29.48	19.2	25.92	4.66	6.72	5.34	5.18	3.9	5.1	5.6	4.69	5.89	6.21	5.34	5.54	0.99	1.35	2.67	2.51	3.39	0.45	0.49	0.66	0.64	0.81
2	1	3	3	LIS	12058	22.23	408.16	58.49	30.9	24.51	26.78	26.76	32.24	20.99	26.22	4.71	5.34	4.47	6.23	4.14	4.95	5.59	5.43	6.4	5.62	5.38	5.71	1.08	1.01	2.27	3.02	3.68	0.47	0.47	0.64	0.67	0.82
2	1	4	4	LIVS	12234.4	23.47	439.61	55.48	28.98	25.2	29.03	29.1	33.94	21.48	27.93	4.82	6.68	5.43	6.61	4.24	5.52	5.71	4.78	5.8	5.58	5.46	5.42	1.12	1.43	2.8	3.43	3.92	0.47	0.5	0.65	0.67	0.83
2	2	1	5	MNI	10343.2	21.44	362.01	61.64	29.1	20.75	22.1	22.74	22.75	14.71	20.42	4.35	4.77	4.38	4.5	3.38	4.24	5.2	5	5.67	5.5	4.73	5.2	0.76	0.85	1.8	1.84	2.27	0.41	0.4	0.57	0.55	0.73
2	2	2	6	MIV	12052.6	23.88	404.97	63	31.6	22.48	26.89	27.53	27.99	17.62	24.5	4.52	6.33	4.92	4.84	3.69	4.9	5.33	4.59	5.95	6.14	5.1	5.41	0.88	1.29	2.53	2.32	2.79	0.44	0.42	0.63	0.62	0.75
2	2	3	7	MIS	13702.4	25.05	403.14	65	35.83	23.42	25.12	25.55	31.3	18.68	25.04	4.53	5.05	4.35	6.07	3.73	4.78	5.64	5.38	6.34	5.59	5.4	5.67	0.97	1	2.15	2.96	3.29	0.45	0.45	0.62	0.68	0.79
2	2	4	8	MIVS	14077.1	25.77	436.75	61.78	33.7	24.14	28.18	28.08	32.41	19.24	26.44	4.58	6.4	5.12	6.32	3.85	5.24	5.65	4.75	5.89	5.54	5.4	5.42	1.05	1.4	2.7	3.26	3.57	0.45	0.44	0.65	0.66	0.8
2	3	1	9	HNI	10158.9	23.9	367.72	67.81	28.68	17.6	18.72	19.57	20.12	9.8	17.04	3.94	4.27	3.96	4.08	2.35	3.76	4.76	4.61	5.34	5.33	4.54	4.87	0.53	0.58	1.26	1.42	1.73	0.34	0.36	0.51	0.49	0.64
2	3	2	10	HIV	11824.9	26.59	407.62	68.84	30.81	19.93	24.18	23.56	24.16	13.33	20.86	4.2	5.75	4.57	4.47	2.94	4.34	5.13	4.57	5.65	5.89	4.86	5.19	0.69	1.05	1.82	1.75	2.23	0.41	0.41	0.6	0.58	0.72
2	3	3	11	HIS	13448.4	27.28	410.44	69.05	34.62	19.89	21.32	21.5	27.49	14.01	21.01	3.93	4.6	3.92	5.48	2.93	4.22	5.36	4.91	5.77	5.4	5.06	5.32	0.71	0.8	1.46	2.44	2.65	0.4	0.42	0.6	0.63	0.77
2	3	4	12	HIVS	13781.8	27.95	444.72	66.52	33	20.65	24.71	23.62	28.31	15.75	22.67	4.1	5.81	4.46	5.69	3.24	4.66	5.45	4.55	5.67	5.37	5.1	5.32	0.86	1.1	1.94	2.48	3	0.42	0.39	0.62	0.62	0.78
2	1	1	1	LNI	9066.68	18.43	343.22	53.25	26.01	21.2	22.57	22.93	23.37	14.93	21.05	4.21	4.58	3.98	4.23	3.27	4.06	4.97	4.82	5.76	5.35	4.54	5.1	0.79	0.85	1.83	1.87	2.56	0.4	0.38	0.54	0.54	0.68
2	1	2	2	LIV	10929.5	20.65	389.45	52.93	27.86	22.66	26.49	26.43	26.82	17.57	24.04	4.28	6.16	4.94	4.71	3.62	4.76	5.21	4.29	5.35	5.63	4.87	5.07	0.92	1.23	2.39	2.21	3.04	0.41	0.44	0.6	0.58	0.74
2	1	3	3	LIS	11321.4	21.17	381.46	54.97	28.98	22.66	24.51	24.81	29.56	19.45	24.12	4.31	4.87	4.16	5.65	3.85	4.6	5.23	4.98	5.87	5.13	4.98	5.25	0.99	0.91	2.1	2.64	3.41	0.44	0.43	0.59	0.61	0.75
2	1	4	4	LIVS	11219.9	21.9	417.7	51.17	27.01	22.86	26.25	26.93	31.25	19.59	25.48	4.41	6	4.99	6.01	3.95	5.03	5.19	4.34	5.37	5.06	5	5	1.02	1.32	2.53	2.95	3.58	0.44	0.46	0.59	0.6	0.76
2	2	1	5	MNI	9771.54	19.97	347.22	57.29	27.75	19.13	20.25	20.74	21.12	13.5	19.1	3.99	4.38	3.98	4.11	3.07	3.92	4.71	4.59	5.16	5.08	4.39	4.74	0.71	0.79	1.65	1.67	2.07	0.37	0.38	0.52	0.51	0.66
2	2	2	6	MIV	11321.9	22.5	381.51	58.62	30.06	20.84	24.85	25.45	25.32	16.54	22.44	4.17	5.82	4.59	4.46	3.44	4.49	5.01	4.24	5.52	5.68	4.74	5.04	0.82	1.19	2.25	2.09	2.61	0.41	0.38	0.57	0.57	0.69
2	2	3	7	MIS	12882.9	23.45	382.96	61.8	33.93	21.83	23.52	23.54	28.41	17.23	22.67	4.12	4.64	4	5.5	3.43	4.37	5.19	4.94	5.88	5.07	4.93	5.14	0.89	0.92	1.95	2.6	3.01	0.41	0.42	0.57	0.61	0.72
2	2	4	8	MIVS	13048.1	23.87	413.11	58.23	31.54	22.06	25.77	25.34	29.55	17.41	24.29	4.25	5.85	4.76	5.82	3.5	4.79	5.19	4.28	5.4	5.02	4.94	4.97	0.95	1.28	2.44	2.81	3.29	0.42	0.4	0.59	0.59	0.73
2	3	1	9	HNI	9444.99	22.21	345.27	63.78	26.88	16.21	17.41	18.06	18.35	9.11	15.71	3.66	4.02	3.66	3.74	2.16	3.42	4.35	4.35	4.91	4.88	4.13	4.57	0.49	0.54	1.17	1.27	1.6	0.32	0.34	0.47	0.45	0.59
2	3	2	10	HIV	11271.8	25.28	384.63	65.86	29.01	18.25	22.56	21.7	22	12.2	19.24	3.84	5.27	4.11	4.11	2.74	4.02	4.69	4.16	5.17	5.28	4.44	4.8	0.63	0.97	1.66	1.56	2.07	0.37	0.38	0.55	0.52	0.66
2	3	3	11	HIS	12821.9	25.24	387.76	64.84	32.29	18.6	19.89	19.79	25.63	13.2	19.52	3.7	4.27	3.71	5.04	2.73	3.89	4.99	4.64	5.36	5.01	4.74	4.91	0.66	0.74	1.35	2.14	2.43	0.38	0.39	0.54	0.57	0.72
2	3	4	12	HIVS	12852.4	25.97	412.57	62.46	30.34	19.16	22.62	21.9	26.43	14.45	20.9	3.83	5.28	4.13	5.28	3	4.28	5.01	4.26	5.25	4.92	4.74	4.83	0.8	1.02	1.77	2.19	2.72	0.39	0.36	0.56	0.56	0.7
2	1	1	1	LNI	8936.96	18.12	338	51.52	25.48	20.01	20.88	21.96	21.92	14.23	19.86	3.88	4.3	3.75	4.01	3.1	3.89	4.72	4.6	5.28	5.19	4.23	4.82	0.75	0.79	1.71	1.72	2.41	0.37	0.37	0.5	0.5	0.64
2	1	2	2	LIV	10574.7	20.17	372.91	51.17	27.54	20.84	24.46	25.18	25.3	16.66	22.76	4.11	5.63	4.57	4.36	3.34	4.44	4.87	3.95	5.04	5.34	4.55	4.76	0.87	1.11	2.17	2.04	2.82	0.39	0.4	0.54	0.54	0.68
2	1	3	3	LIS	10599.7	20.14	367.29	51.31	28.23	22.05	23.2	23.91	26.89	17.96	22.92	4.15	4.49	3.97	5.22	3.59	4.28	4.95	4.79	5.7	4.81	4.77	4.97	0.95	0.86	1.99	2.32	3.22	0.41	0.41	0.54	0.55	0.69
2	1	4	4	LIVS	10856.4	20.5	407.45	49.6	25.39	21.69	24.91	25.38	28.56	18.58	23.54	4.06	5.68	4.61	5.71	3.66	4.82	4.85	3.98	5.08	4.7	4.64	4.69	0.95	1.22	2.38	2.53	3.3	0.42	0.44	0.56	0.56	0.71
2	2	1	5	MNI	9227.89	19.49	336.92	55.72	27.29	18.01	19.56	19.47	19.91	12.99	18.03	3.73	4.2	3.73	3.92	2.88	3.71	4.48	4.32	4.79	4.69	4.13	4.55	0.67	0.74	1.54	1.55	1.95	0.36	0.36	0.49	0.48	0.63
2	2	2	6	MIV	11087	21.8	364.94	56.03	28.13	20.11	23.38	23.85	24.09	15.65	21.58	3.97	5.46	4.29	4.14	3.31	4.2	4.7	3.97	5.23	5.46	4.48	4.78	0.76	1.1	2.07	1.9	2.45	0.39	0.37	0.53	0.53	0.68
2	2	3	7	MIS	12549.5	23.21	369.37	59.38	31.85	20.29	22.07	22.46	26.09	15.99	21.39	3.89	4.38	3.79	5.26	3.25	4.05	4.85	4.76	5.46	4.63	4.63	4.93	0.85	0.89	1.85	2.34	2.75	0.4	0.4	0.55	0.54	0.69
2	2	4	8	MIVS	12220.6	22.93	391.32	55.4	29.86	21.32	23.91	23.98	27.47	16.63	22.37	3.95	5.6	4.43	5.35	3.27	4.58	5.01	4.06	4.94	4.78	4.71	4.72	0.88	1.21	2.34	2.51	3.11	0.4	0.39	0.53	0.54	0.7
2	3	1	9	HNI	9067.23	21.33	333.34	61.78	26.65	15.25	16.87	17.09	17.57	8.71	15.34	3.51	3.86	3.42	3.52	2.06	3.26	4.13	4.13	4.62	4.62	3.94	4.29	0.47	0.53	1.11	1.14	1.5	0.31	0.31	0.43	0.41	0.57
2	3	2	10	HIV	10611	24.33	369.76	62.02	27.2	16.87	20.95	20.25	20.66	11.43	18.31	3.64	4.97	3.89	3.84	2.56	3.82	4.32	3.97	4.82	4.97	4.16	4.42	0.6	0.89	1.51	1.43	1.92	0.36	0.35	0.51	0.49	0.63
2	3	3	11	HIS	12171.1	24.71	374.76	63.64	31.41	17.81	19.44	19.07	24.22	12.63	18.37	3.58	4.18	3.53	4.84	2.67	3.71	4.71	4.39	5.1	4.7	4.55	4.71	0.62	0.7	1.28	1.9	2.33	0.37	0.37	0.51	0.54	0.67
2	3	4	12	HIVS	12196.1	25.17	402.91	59.3	29.1	18.42	21.73	20.4	24.79	13.6	19.74	3.56	5.05	3.92	4.87	2.89	4.08	4.74	4.03	4.89	4.77	4.56	4.51	0.76	0.96	1.66	1.89	2.59	0.38	0.35	0.52	0.53	0.66

## Sheet: leaf relative water content 
	BV11	AV11	BSK	ASK	FL
NI	84.6	85.5259	83	76	53.6773
IV	82.4657	97.2	90.36	86.0779	63.3452
IS	83.5727	84.4473	81.08	92.94	68.108
IVS	87	96.5114	93.24	97.514	70.0132
320 mm	320	320	320	320	320
MIBSₕ	366.63	366.63	366.63	366.63	366.63
	69.6	70.5259	68	61	38.6773
	5.1156	5.67487	5.48251	5.73382	4.8029
LSD	10.44	11.5814	11.1888	11.7017	9.80184
2015 M	BV11	AV11	BSK	ASK	FL
NI	79.6423	83.592	75.6346	68.9037	45.3084
IV	84.2669	98.9045	87.12	81.2591	56.6773
IS	83.4	85.7584	78.9824	90.2	60.0113
IVS	79.657	97.0561	88.92	94.12	63.3452
MNIₕ	320	320	320	320	320
MIBSₕ	366.63	366.63	366.63	366.63	366.63
	64.6423	68.592	60.6346	53.9037	30.3084
	4.48867	5.46911	5.01064	5.30366	4.34548
LSD	9.16056	11.1615	10.2258	10.8238	8.86833
2015 H	BV11	AV11	BSK	ASK	FL
NI	73.1041	75.6154	65.52	57.3074	31.3396	Before sowing	2015	BV11	AV11	BSK	ASK	FL
IV	77.0809	92.9232	77.9438	70.15	46.6754	480.92	LNI	84.6	85.5259	83	76	53.6773
IS	76.8	77.7322	68.0181	80.8107	50.0094		LIV	82.4657	97.2	90.36	86.0779	63.3452
IVS	76.7234	90.5904	75.6	86.06	50.0094		LIS	83.5727	84.4473	81.08	92.94	68.108
MNIₕ	320	320	320	320	320		LIVS	87	96.5114	93.24	97.514	70.0132
MIBSₕ	366.63	366.63	366.63	366.63	366.63		MNI	79.6423	83.592	75.6346	68.9037	45.3084
	58.1041	60.6154	50.52	42.3074	16.3396		MIV	84.2669	98.9045	87.12	81.2591	56.6773
	3.98501	4.70527	3.92666	4.46996	3.43064		MIS	83.4	85.7584	78.9824	90.2	60.0113
LSD	8.13268	9.60258	8.0136	9.12236	7.00132		MIVS	79.657	97.0561	88.92	94.12	63.3452
							HNI	73.1041	75.6154	65.52	57.3074	31.3396
2016 L	BV11	AV11	BSK	ASK	FL		HIV	77.0809	92.9232	77.9438	70.15	46.6754
NI	75.248	74.632	77.52	73.72	39.852		HIS	76.8	77.7322	68.0181	80.8107	50.0094
IV	79.696	90.2436	93.784	85.1717	50.859		HIVS	76.7234	90.5904	75.6	86.06	50.0094
IS	84.8616	82.9312	87.0528	94.7211	55.463		2016	BV11	AV11	BSK	ASK	FL
IVS	85.6	94.3616	97.28	98.7984	56.6549		LNI	75.248	74.632	77.52	73.72	39.852
MNIₕ	320	320	320	320	320		LIV	79.696	90.2436	93.784	85.1717	50.859
MIBSₕ	332.62	332.62	332.62	332.62	332.62		LIS	84.8616	82.9312	87.0528	94.7211	55.463
	60.248	59.632	62.52	58.72	24.852		LIVS	85.6	94.3616	97.28	98.7984	56.6549
	4.61384	5.54846	5.72006	5.80935	3.88653		MNI	68	69.4947	75.796	63.2317	33.048
LSD	9.416	11.3234	11.6736	11.8558	7.93169		MIV	74.4063	90.4048	92.264	79.92	45.36
							MIS	76.5916	78.7816	84.22	90.4464	49.3352
2016 M	BV11	AV11	BSK	ASK	FL		MIVS	78.8403	91.7438	96.14	96.48	51.516
NI	68	69.4947	75.796	63.2317	33.048		HNI	56.4	59.8596	57	49.91	23.328
IV	74.4063	90.4048	92.264	79.92	45.36		HIV	64.9456	80.3452	72.7551	64.6642	35.4914
IS	76.5916	78.7816	84.22	90.4464	49.3352		HIS	66.0336	69.3728	64.676	74.2	39.528
IVS	78.8403	91.7438	96.14	96.48	51.516		HIVS	68.2413	81.9625	75.62	78.12	42.768
MNIₕ	320	320	320	320	320
MIBSₕ	332.62	332.62	332.62	332.62	332.62
	53	54.4947	60.796	48.2317	18.048
	4.63581	5.39454	5.65303	5.67302	3.534
LSD	9.46083	11.0093	11.5368	11.5776	7.21224
2016 H	BV11	AV11	BSK	ASK	FL
NI	56.4	59.8596	57	49.91	23.328
IV	64.9456	80.3452	72.7551	64.6642	35.4914
IS	66.0336	69.3728	64.676	74.2	39.528
IVS	68.2413	81.9625	75.62	78.12	42.768
MNIₕ	320	320	320	320	320
MIBSₕ	332.62	332.62	332.62	332.62	332.62
	41.4	44.8596	42	34.91	8.328
	4.01259	4.8194	4.44646	4.59346	2.93388
LSD	8.18896	9.8355	9.0744	9.3744	5.98752

## Sheet: Gs
	BV11	AV11	BSK	ASK	FL
NI	0.219	0.232016	0.225	0.2	0.134946
IV	0.206164	0.27	0.251	0.239679	0.150822
IS	0.206432	0.242909	0.228	0.263	0.162162
IVS	0.22	0.281976	0.259	0.2803	0.166698
320 mm	320	320	320	320	320
MIBSₕ	366.63	366.63	366.63	366.63	366.63
	0.26	0.321976	0.299	0.3203	0.206698
	0.012936	0.0165802	0.0152292	0.0164816	0.0114355
LSD	0.0264	0.0338371	0.03108	0.033636	0.0233377
2015 M	BV11	AV11	BSK	ASK	FL
NI	0.199106	0.2322	0.210096	0.194334	0.11502
IV	0.210667	0.269179	0.242	0.23043	0.134946
IS	0.216	0.23544	0.21384	0.26	0.142884
IVS	0.199143	0.283489	0.247	0.276	0.150822
MNIₕ	320	320	320	320	320
MIBSₕ	366.63	366.63	366.63	366.63	366.63
	0.249143	0.323489	0.287	0.316	0.190822
	0.0112217	0.0159746	0.0139184	0.0155526	0.0103464
LSD	0.0229014	0.0326013	0.028405	0.03174	0.0211151
2015 H	BV11	AV11	BSK	ASK	FL
NI	0.18276	0.210043	0.182	0.154885	0.07938	Before sowing	2015	BV11	AV11	BSK	ASK	FL
IV	0.192702	0.25812	0.210955	0.195	0.111132	480.92	LNI	0.219	0.232016	0.225	0.2	0.134946	0.250578
IS	0.192	0.213145	0.186161	0.22111	0.11907		LIV	0.206164	0.27	0.251	0.239679	0.150822	0.2916
IVS	0.191809	0.25164	0.21	0.238	0.11907		LIS	0.206432	0.242909	0.228	0.263	0.162162	0.262342
MNIₕ	320	320	320	320	320		LIVS	0.22	0.281976	0.259	0.2803	0.166698	0.304534
MIBSₕ	366.63	366.63	366.63	366.63	366.63		MNI	0.199106	0.2322	0.210096	0.194334	0.11502	0.250776
	0.231809	0.29164	0.25	0.278	0.15907		MIV	0.210667	0.269179	0.242	0.23043	0.134946	0.290714
	0.00996253	0.0130702	0.0109074	0.0123617	0.0081682		MIS	0.216	0.23544	0.21384	0.26	0.142884	0.254275
LSD	0.0203317	0.0266738	0.02226	0.025228	0.0166698		MIVS	0.199143	0.283489	0.247	0.276	0.150822	0.306168
							HNI	0.18276	0.210043	0.182	0.154885	0.07938	0.226846
2016 L	BV11	AV11	BSK	ASK	FL		HIV	0.192702	0.25812	0.210955	0.195	0.111132	0.27877
NI	0.18812	0.1964	0.204	0.194	0.09963		HIS	0.192	0.213145	0.186161	0.22111	0.11907	0.230197
IV	0.19924	0.237483	0.2468	0.236588	0.127148		HIVS	0.191809	0.25164	0.21	0.238	0.11907	0.271771
IS	0.212154	0.21824	0.229086	0.263114	0.138657		2016	BV11	AV11	BSK	ASK	FL
IVS	0.214	0.24832	0.256	0.27444	0.141637		LNI	0.18812	0.1964	0.204	0.194	0.09963
MNIₕ	320	320	320	320	320		LIV	0.19924	0.237483	0.2468	0.236588	0.127148
MIBSₕ	332.62	332.62	332.62	332.62	332.62		LIS	0.212154	0.21824	0.229086	0.263114	0.138657
	0.254	0.28832	0.296	0.31444	0.181637		LIVS	0.214	0.24832	0.256	0.27444	0.141637
	0.0115346	0.0146012	0.0150528	0.0161371	0.00971632		MNI	0.17	0.182881	0.1942	0.170088	0.08262
LSD	0.02354	0.0297984	0.03072	0.0329328	0.0198292		MIV	0.186016	0.237907	0.2428	0.222	0.1134
							MIS	0.191479	0.20732	0.219	0.25124	0.123338
2016 M	BV11	AV11	BSK	ASK	FL		MIVS	0.197101	0.241431	0.253	0.268	0.12879
NI	0.17	0.182881	0.1942	0.170088	0.08262		HNI	0.141	0.157525	0.15	0.1426	0.05832
IV	0.186016	0.237907	0.2428	0.222	0.1134		HIV	0.162364	0.211435	0.191461	0.184755	0.0887286
IS	0.191479	0.20732	0.219	0.25124	0.123338		HIS	0.165084	0.18256	0.1702	0.212	0.09882
IVS	0.197101	0.241431	0.253	0.268	0.12879		HIVS	0.170603	0.215691	0.199	0.2232	0.10692
MNIₕ	320	320	320	320	320
MIBSₕ	332.62	332.62	332.62	332.62	332.62
	0.237101	0.281431	0.293	0.308	0.16879
	0.0115895	0.0141962	0.0148764	0.0157584	0.00883499
LSD	0.0236521	0.0289717	0.03036	0.03216	0.0180306
2016 H	BV11	AV11	BSK	ASK	FL
NI	0.141	0.157525	0.15	0.1426	0.05832
IV	0.162364	0.211435	0.191461	0.184755	0.0887286
IS	0.165084	0.18256	0.1702	0.212	0.09882
IVS	0.170603	0.215691	0.199	0.2232	0.10692
MNIₕ	320	320	320	320	320
MIBSₕ	332.62	332.62	332.62	332.62	332.62
	0.210603	0.255691	0.239	0.2632	0.14692
	0.0100315	0.0126826	0.0117012	0.0131242	0.00733471
LSD	0.0204724	0.0258829	0.02388	0.026784	0.0149688

## Sheet: Ci
	BV11	AV11	BSK	ASK	FL
NI	104.083	119.892	140.569	125.365	146.727
IV	110.107	132.13	147.004	131.179	157.869
IS	109.991	113.968	130.623	152.413	167.442
IVS	103.527	135.466	145.121	156.167	173.249
320 mm	320	320	320	320	320
MIBSₕ	366.63	366.63	366.63	366.63	366.63
	128.527	160.466	170.121	181.167	198.249
	6.59465	8.62921	9.24422	9.94782	9.34653
LSD	13.4585	17.6106	18.8658	20.3017	19.0746
2015 M	BV11	AV11	BSK	ASK	FL
NI	103.756	106.221	124.555	116.515	166.573
IV	98.2652	125.49	131.886	132.553	179.727
IS	95.9111	101.075	118.822	150.153	188.125
IVS	103.707	131.142	135.009	158.319	197.869
MNIₕ	320	320	320	320	320
MIBSₕ	366.63	366.63	366.63	366.63	366.63
	128.707	156.142	160.009	183.319	222.869
	6.60613	8.35378	8.60006	10.0849	10.6107
LSD	13.4819	17.0485	17.5511	20.5814	21.6545
2015 H	BV11	AV11	BSK	ASK	FL
NI	105.519	103.325	128.295	121.75	204.238	Before sowing	2015	BV11	AV11	BSK	ASK	FL
IV	101.939	128.254	145.446	135.609	207.063	480.92	LNI	104.083	119.892	140.569	125.365	146.727
IS	102.123	107.861	132.994	153.867	217.013		LIV	110.107	132.13	147.004	131.179	157.869
IVS	102.346	125.396	149.954	165.885	221.895		LIS	109.991	113.968	130.623	152.413	167.442
MNIₕ	320	320	320	320	320		LIVS	103.527	135.466	145.121	156.167	173.249
MIBSₕ	366.63	366.63	366.63	366.63	366.63		MNI	103.756	106.221	124.555	116.515	166.573
	127.346	150.396	174.954	190.885	246.895		MIV	98.2652	125.49	131.886	132.553	179.727
	6.51941	7.98772	9.55207	10.5669	13.01		MIS	95.9111	101.075	118.822	150.153	188.125
LSD	13.3049	16.3015	19.494	21.5651	26.551		MIVS	103.707	131.142	135.009	158.319	197.869
							HNI	105.519	103.325	128.295	121.75	204.238
2016 L	BV11	AV11	BSK	ASK	FL		HIV	101.939	128.254	145.446	135.609	207.063
NI	110.872	106.056	148.104	142.308	183.98		HIS	102.123	107.861	132.994	153.867	217.013
IV	119.544	128.241	162.888	156.148	187.711		HIVS	102.346	125.396	149.954	165.885	221.895
IS	127.292	117.85	151.197	173.655	187.574		2016	BV11	AV11	BSK	ASK	FL
IVS	128.4	134.093	168.96	181.13	195.862		LNI	110.872	106.056	148.104	142.308	183.98
MNIₕ	320	320	320	320	320		LIV	119.544	128.241	162.888	156.148	187.711
MIBSₕ	332.62	332.62	332.62	332.62	332.62		LIS	127.292	117.85	151.197	173.655	187.574
	153.4	159.093	193.96	206.13	220.862		LIVS	128.4	134.093	168.96	181.13	195.862
	8.17908	8.54171	10.7628	11.538	11.7196		MNI	100	98.7556	138.853	137.871	212.313
LSD	16.692	17.4321	21.9648	23.547	23.9175		MIV	111.609	126.329	157.577	154.078	204.554
							MIS	114.887	111.953	149.358	165.818	196.618
2016 M	BV11	AV11	BSK	ASK	FL		MIVS	118.26	130.373	166.98	176.88	194.601
NI	100	98.7556	138.853	137.871	212.313		HNI	93.06	93.57	118.8	123.528	226.09
IV	111.609	126.329	157.577	154.078	204.554		HIV	102.289	119.884	143.213	148.035	210.139
IS	114.887	111.953	149.358	165.818	196.618		HIS	108.955	108.441	131.054	153.912	201.258
IVS	118.26	130.373	166.98	176.88	194.601		HIVS	112.598	128.12	153.23	162.043	192.084
MNIₕ	320	320	320	320	320
MIBSₕ	332.62	332.62	332.62	332.62	332.62
	143.26	155.373	191.98	201.88	237.313
	7.53319	8.30475	10.6366	11.2673	13.5243
LSD	15.3738	16.9485	21.7074	22.9944	27.6006
2016 H	BV11	AV11	BSK	ASK	FL
NI	93.06	93.57	118.8	123.528	226.09
IV	102.289	119.884	143.213	148.035	210.139
IS	108.955	108.441	131.054	153.912	201.258
IVS	112.598	128.12	153.23	162.043	192.084
MNIₕ	320	320	320	320	320
MIBSₕ	332.62	332.62	332.62	332.62	332.62
	137.598	153.12	178.23	187.043	251.09
	7.17251	8.16127	9.76075	10.3222	14.4019
LSD	14.6378	16.6556	19.9199	21.0656	29.3917
